# Supplementary material
Source: PubMed Central journal article supplement (PMC7034641)
Supplement: NIHMS1549127-supplement-Supplemental_Material.pdf [file NIHMS1549127-supplement-Supplemental_Material.pdf]

# Implementation of High-intensity Stepping Training during Inpatient Stroke Rehabilitation Improves Functional Outcomes

Moore JL, Nordvik J, Erichsen A, Rosseland I, Bø E, Hornby TG.

## SUPPLEMENTAL MATERIAL

**Supplementary Table I.** Total admissions and reasons excluded per site in usual care and high-intensity stepping.

|                                                                               | Usual Care<br>Feb-Nov 2017 |     | High Intensity<br>Training<br>Jan-Nov 2018 |     |
|-------------------------------------------------------------------------------|----------------------------|-----|--------------------------------------------|-----|
|                                                                               | Ouh                        | Oms | Ouh                                        | Oms |
| Not willing to participate                                                    | 7                          | 7   | 4                                          | 4   |
| Not able to provide consent*                                                  | 15                         | 5   | 17                                         | 14  |
| Uncontrolled cardiopulmonary, metabolic, infectious or psychiatric disorders* | 17                         | 7   | 42                                         | 21  |
| Less than or 2 at BBS#3*                                                      | 6                          | 0   | 0                                          | 1   |
| FAC 5 or primary goals not related to walking*                                | 27                         | 0   | 33                                         | 0   |
| > 2 months since stroke*                                                      | 0                          | 2   | 0                                          | 8   |
| Other reasons not stated                                                      | 1                          | 0   | 2                                          | 0   |
| Total                                                                         | 73                         | 21  | 98                                         | 48  |
| <b>Total excluded per phase</b>                                               | <b>94</b>                  |     | <b>146</b>                                 |     |
| <b>Total included per phase</b>                                               | <b>56</b>                  |     | <b>54</b>                                  |     |
| <b>Total admitted with stroke diagnosis</b>                                   | <b>150</b>                 |     | <b>200</b>                                 |     |
| *Exclusion-criteria                                                           |                            |     |                                            |     |

**Supplementary Table II.** Regression equations for primary variables.

*Equation 1: Discharge FS = 0.40 \* (Admission FS) + 0.058 \* (steps / day) / 1000 + -0.01 \* age + 0.16 \* (paretic strength) + 0.008 \* (LOS) + 0.51; r<sup>2</sup> = 0.56*

*Equation 2: Change FS = -0.60 \* (Admission FS) + 0.058 \* (steps / day) / 1000 - 0.01 \* age + 0.16 \* (paretic strength) + 0.008 \* (LOS) + 0.51; r<sup>2</sup> = 0.45*

*Equation 3: Discharge 6MWT = 0.49 \* (Admission 6MWT) + 20 \* (steps / day) / 1000 - 3.6 \* age + 1.9 \* (LOS) + 34 \* (paretic strength) + 216; r<sup>2</sup> = 0.69*

*Equation 4: Change 6MWT = -3.6 \* age - 0.51 \* (Admission 6MWT) + 20 \* (steps / day) / 1000 + 1.9 \* (LOS) + 34 \* (paretic strength) + 216; r<sup>2</sup> = 0.45*

*Equation 5: Discharge BBS = 0.56 \* (Admission BBS) + 0.24 \* (LOS) + 0.95 \* (steps / day) / 1000 + 0.15; r<sup>2</sup> = 0.65*

*Equation 6: Change BBS = -0.44 \* (Admission BBS) + 0.24 \* (LOS) + 0.95 \* (steps / day) / 1000 + 0.15; r<sup>2</sup> = 0.65*
